1 **Dissecting the association of C-reactive protein levels with PTSD, traumatic events,**  
2 **and social support**

3

4 Carolina Muniz Carvalho, MSc,<sup>1,2,3</sup> Frank R Wendt, PhD,<sup>1</sup> Adam X. Maihofer, MSc,<sup>4,5</sup>  
5 Dan J. Stein, FRCPC, PhD,<sup>6</sup> Murray B. Stein, MD, MPH,<sup>4,7</sup> Jennifer A. Sumner, PhD,<sup>8</sup>  
6 Sian M. J. Hemmings, PhD,<sup>9</sup> Caroline M. Nievergelt, PhD,<sup>4,5</sup> Karestan C. Koenen,  
7 PhD,<sup>10</sup> Joel Gelernter, MD,<sup>1,11</sup> Sintia I Belangero, PhD,<sup>2,3</sup> Renato Polimanti, PhD<sup>1</sup>

8

9 Author Affiliations

- 10 1. Department of Psychiatry, Yale School of Medicine and VA CT Healthcare Center,  
11 West Haven, CT 06516, USA  
12 2. Department of Psychiatry, Universidade Federal de São Paulo (UNIFESP), São  
13 Paulo, SP, Brazil  
14 3. Genetics Division, Department of Morphology and Genetics, Universidade Federal  
15 de São Paulo (UNIFESP), São Paulo, SP, Brazil  
16 4. Department of Psychiatry, School of Medicine, University of California, San Diego,  
17 La Jolla, CA, USA  
18 5. Center of Excellence for Stress and Mental Health, Veterans Affairs San Diego  
19 Healthcare System, San Diego, CA, USA  
20 6. MRC Unit on Risk & Resilience in Mental Disorders, Department of Psychiatry and  
21 Neuroscience Institute, University of Cape Town, Cape Town, South Africa  
22 7. Psychiatry Service, Veterans Affairs San Diego Healthcare System, San Diego, CA,  
23 USA  
24 8. Department of Psychology, University of California, Los Angeles, Los Angeles,  
25 CA, USA  
26 9. Department of Psychiatry, Faculty of Medicine and Health Sciences, Stellenbosch  
27 University, Cape Town, South Africa  
28 10. Department of Epidemiology, Harvard School of Public Health, Boston, MA,  
29 United States  
30 11. Departments of Genetics and Neuroscience, Yale University School of Medicine,  
31 New Haven, CT 06510, USA

32

33 Corresponding author: Renato Polimanti, PhD. Yale University School of Medicine,  
34 Department of Psychiatry. VA CT 116A2, 950 Campbell Avenue, West Haven, CT  
35 06516, USA. Phone: +1 (203) 932-5711 x5745. Fax: +1 (203) 937-3897. E-mail:  
36 [renato.polimanti@yale.edu](mailto:renato.polimanti@yale.edu). ORCID: 0000-0003-0745-6046.

37

38 **Running Title:** C-Reactive Protein and Posttraumatic Stress

39

40 **Abstract**

41 Inflammatory markers like C-reactive protein (CRP) have been associated with  
42 posttraumatic stress disorder (PTSD) and traumatic experience, but the underlying  
43 mechanisms are unclear. We investigated the association among CRP, PTSD, and traits  
44 related to traumatic events and social support using genome-wide data from the  
45 Psychiatric Genomics Consortium (30,000 cases and 170,000 controls), the UK  
46 Biobank (UKB; up to 117,900 individuals), and the CHARGE study (Cohorts for Heart  
47 and Aging Research in Genomic Epidemiology, 148,164 individual). Linkage  
48 disequilibrium score regression, polygenic risk scoring, and two-sample Mendelian  
49 randomization analyses were used to investigate genetic overlap and causal  
50 relationships. Genetic correlations of CRP were observed with PTSD ( $r_g=0.16$ ,  
51  $p=0.026$ ) and behavioral and emotional response to trauma, exposure to traumatic  
52 events, and the presence of social support ( $-0.28 < r_g < 0.20$ ;  $p < 0.008$ ). We observed a  
53 bidirectional association between CRP and PTSD (CRP→PTSD:  $\beta=0.065$ ,  $p=0.015$ ;  
54 PTSD→CRP:  $\beta=0.008$ ,  $p=0.009$ ). CRP also showed a negative association on the “felt  
55 loved as a child” trait (UKB,  $\beta=-0.017$ ,  $p=0.008$ ). Due to the known association of  
56 socioeconomic status (SES) on PTSD and social support, a multivariable MR was  
57 performed to investigate SES as potential mediator. We found that household income  
58 (univariate MR:  $\beta=-0.22$ ,  $p=1.57 \times 10^{-7}$ ; multivariate MR:  $\beta=-0.17$ ,  $p=0.005$ ) and  
59 deprivation index (univariate MR:  $\beta=0.38$ ,  $p=1.63 \times 10^{-9}$ ; multivariate MR:  $\beta=0.27$ ,  
60  $p=0.016$ ) were driving the causal estimates of “felt loved as a child” and CRP on PTSD.  
61 The present findings highlight a bidirectional association between PTSD and CRP  
62 levels, also suggesting a potential role of SES in the interplay between childhood  
63 support and inflammatory processes with respect to PTSD risk.

64

## 65 **Introduction**

66 Posttraumatic stress disorder (PTSD) is a common psychiatric condition that can  
67 occur after experiencing or witnessing traumatic events.<sup>1</sup> Inflammatory processes,  
68 reflected by blood-based markers like C-reactive protein (CRP), could be involved in  
69 the biology of the trauma response and PTSD.<sup>2</sup> CRP is a protein that responds to  
70 inflammatory stimuli by triggering cellular reactions such as those related to  
71 macrophage recruitment during inflammation initiation.<sup>3</sup> Elevated levels of pro-  
72 inflammatory cytokines (e.g. interleukins; a downstream product of CRP signaling) and  
73 acute-phase proteins (e.g. CRP) have been observed in the blood of individuals with  
74 PTSD.<sup>4, 5</sup> Meta-analyses of cross-sectional studies have confirmed the association of  
75 inflammation with traumatic events and PTSD.<sup>6,7</sup> Longitudinal studies reported  
76 evidence supporting a bidirectional association: elevated inflammation may contribute  
77 to PTSD and that PTSD contributes to elevated inflammation.<sup>8-13</sup> Additionally, PTSD is  
78 well-known to be associated with many chronic diseases (e.g., cardiovascular diseases,  
79 type-2 diabetes, and rheumatoid arthritis) with an established inflammatory  
80 component.<sup>14-16</sup> Understanding the mechanisms underlying the PTSD-inflammation  
81 association can potentially lead to important translational implications. If inflammation  
82 is causal for PTSD, inflammatory markers may be useful in identifying persons at risk,  
83 and anti-inflammatory treatments may be therapeutic. If PTSD causes inflammation,  
84 this would provide evidence for one pathway via which PTSD increases risk of chronic  
85 disease and may support screening for inflammation in persons with PTSD. A third  
86 hypothesis is that the relation between inflammation and PTSD is not causal in either  
87 direction but accounted for by a third factor.

88 Analytic approaches based on large-scale genome-wide datasets may help us to  
89 understand how inflammatory processes and CRP levels are related to etiology or  
90 consequences of PTSD. Mendelian randomization (MR) can be used to investigate  
91 causal relationships using genetic variants (e.g., single nucleotide polymorphisms –  
92 SNPs) as instrumental variables in genetic epidemiologic experiments analogous to  
93 randomized control trials.<sup>17-19</sup> In this context, we investigated the genetic overlap and  
94 the putative causal relationships linking CRP and PTSD, leveraging large-scale  
95 genome-wide datasets from the Psychiatric Genomic Consortium PTSD Workgroup  
96 (PGC-PTSD), the UK Biobank (UKB), and the Cohorts for Heart and Aging Research  
97 in Genomic Epidemiology (CHARGE) study. To investigate more broadly the  
98 relationship between trauma and inflammation, we also tested traits related to

99 behavioral and emotional response to trauma, exposure to traumatic events, and the  
100 presence of social support. Additionally, since socioeconomic status has a well-  
101 established relationship with the traits investigated (i.e., PTSD, CRP, traumatic events,  
102 and social support),<sup>20-22</sup> we tested whether the associations observed are independent  
103 from the effects that are mediated by socioeconomic status (SES).

104

## 105 **Materials and methods**

### 106 *Cohorts Investigated*

107 Genome-wide association data for PTSD were obtained from PGC-PTSD using Freezes  
108 1.5 and 2. PGC-PTSD Freeze 2 includes 23,185 cases and 151,309 controls of European  
109 descent, including both PGC and UKB samples. PGC-PTSD Freeze 1.5 includes only  
110 12,823 cases and 35,648 controls available from PGC samples (i.e., UKB samples were  
111 not included in the Freeze 1.5 meta-analysis). We used the PGC-PTSD Freeze 1.5  
112 dataset to exclude the potential bias induced by the overlap between PGC-PTSD Freeze  
113 2 and UKB samples in the PRS and MR analyses. PTSD diagnosis across PGC-PTSD  
114 cohorts was obtained considering different version of DSM criteria (DSM-III-R, DSM  
115 IV, DSM-5). A detailed description of the QC criteria and GWAS methods was reported  
116 previously.<sup>23</sup>

117 To investigate inflammatory processes, we used the genome-wide data generated  
118 by the CHARGE Inflammation Working Group, which investigated the genetics of  
119 circulatory CRP levels measured via standard laboratory techniques in up to 148,164  
120 subjects of European ancestry.<sup>24</sup>

121 Additionally, we obtained GWAS summary association data related to trauma  
122 traits, behavioral and emotional response to trauma, exposure to traumatic events, and  
123 the presence of social support from the UK Biobank (UKB)<sup>25</sup> included in the category  
124 “traumatic events” (UKB Field ID: 145). These were assessed via the UKB online  
125 mental health questionnaire (up to 118,000 individuals of European descent).<sup>26</sup> In  
126 addition, we investigated indicators of SES, considering “Average total household  
127 income before tax” (UKB Field ID: 738, household income) and “Townsend  
128 deprivation index at recruitment” (UKB Field ID: 189, deprivation index).<sup>27</sup> Details  
129 regarding QC criteria and GWAS methods of this previous analysis are available at  
130 [https://github.com/Nealelab/UK\\_Biobank\\_GWAS/tree/master/imputed-v2-gwas](https://github.com/Nealelab/UK_Biobank_GWAS/tree/master/imputed-v2-gwas).

131 Briefly, the association analyses for all phenotypes were conducted using regression  
132 models available in Hail (available at <https://github.com/hail-is/hail>) including the first

133 20 ancestry principal components, sex, age, age<sup>2</sup>, sex×age, and sex×age<sup>2</sup> as covariates.  
134 Details regarding the UKB traits investigated in this study are reported in Supplemental  
135 Table 1.

136

### 137 *Heritability and Genetic Correlation*

138 To estimate observed-scale SNP-heritability and genetic correlation among the  
139 phenotypes interrogated in this project (PGC-PTSD Freeze 2, CRP, trauma traits, and  
140 socioeconomic status traits), we performed Linkage Disequilibrium Score Regression  
141 (LDSC) according to the pipeline described previously (available at  
142 <https://github.com/bulik/ldsc>).<sup>28</sup>

143 We also calculated the heritability z-score, which is defined as the heritability  
144 estimate produced by LDSC divided by its standard error. The heritability z-score is  
145 able to capture information about the genetic architecture of a trait and the reliability of  
146 each heritability estimate. As recommended by LDSC best practice, we conducted  
147 genetic correlation analysis only using traits with heritability z-score > 4.<sup>28</sup> Genetic  
148 correlations were adjusted for multiple testing using false discovery rate (FDR),  
149 considering  $Q < 0.05$  as the significance threshold.

150

### 151 *Polygenic Risk Score (PRS) and Definition of the Genetic Instruments*

152 PRS were calculated using PRSice v1.25 software (available at  
153 <http://prsic.info/>)<sup>29</sup> and considering the following parameters: clumping with a linkage  
154 disequilibrium (LD) cutoff of  $R^2 = 0.001$ , 10,000-kb as clumping window, and  
155 exclusion of major histocompatibility complex (MHC) region of the genome because of  
156 its complex LD structure. European samples from the 1000 Genomes Project were used  
157 as the LD reference panel.

158 To conduct this PRS analysis, we used GWAS summary data from the cohorts  
159 described above (PGC-PTSD freeze 1.5 - to avoid sample overlap between PGC-PTSD  
160 Freeze 2.0 and UKB). We applied FDR multiple testing correction to correct the p-value  
161 for the number of PRS p-value thresholds tested at  $Q < 0.05$ .

162

### 163 *Mendelian Randomization (MR)*

164 We used the R package TwoSampleMR<sup>30</sup> to infer the causal relationship between  
165 the phenotypes of interest, testing genetic variants (i.e., SNPs) which survived the PRS  
166 FDR correction as instrumental variables. This R package permits conducting five MR

167 analysis: inverse variance weighted (IVW), MR-Egger, weighted median, simple mode,  
168 and weighted mode.<sup>30</sup> These methods were considered to verify the stability of the  
169 causal effects of MR results and the IVW approach was reported as the main results due  
170 to its higher statistical power.<sup>31</sup> The MR analysis was conducted in accordance with the  
171 STROBE (STrengthening the Reporting of Observational studies in Epidemiology) -  
172 MR reporting guidelines.<sup>32</sup>

173 Multiple MR sensitivity tests were performed to investigate the presence of  
174 horizontal pleiotropy and heterogeneity among the variants included within the genetic  
175 instruments tested: MR-Egger regression intercept,<sup>33</sup> MR-PRESSO (Pleiotropy  
176 RESidual Sum and Outlier) global test,<sup>34</sup> and MR heterogeneity test.<sup>35</sup> Outliers  
177 contributing to the heterogeneity and horizontal pleiotropy within the genetic  
178 instruments were identified via a leave-one-out analysis and considering MR-RAPS  
179 (MR-Robust Adjusted Profile Score)<sup>36</sup> standardized residuals that fall outside the 95%  
180 confidence level.

181 Multivariable MR (MVMR) was applied to estimate the effect of two or more  
182 traits (risk factors) on a specific outcome (disease) using the multivariable IVW  
183 approach available in the MendelianRandomization R package.<sup>37</sup>

184

## 185 **Results**

### 186 *Genetic Correlation and Polygenic Risk Scores analyses*

187 SNP-heritability was estimated for all traits investigated in this study and we  
188 found that 4 trauma response traits, 12 trauma exposure traits, and 2 socioeconomic  
189 status traits had heritability  $z$ -score $>4$  (Supplemental Table 2). We found a positive  
190 genetic correlation between CRP and PTSD diagnosis (PGC-PTSD Freeze 2:  $r_g=0.155$ ,  
191  $p=0.026$ ). After multiple testing correction (FDR at 5%), we observed significant  
192 genetic correlation of CRP with seven traits related to behavioral and emotional  
193 response to trauma, exposure to traumatic events, and the presence of social support  
194 (Figure 1). Positive genetic correlation was also observed between CRP and  
195 socioeconomic status: deprivation index,  $r_g=0.20$ ,  $p=3.38\times 10^{-5}$ ; household income,  $r_g=-$   
196  $0.25$ ,  $p=4.08\times 10^{-10}$ . The direction of the genetic correlations of CRP was in line with  
197 expectations: positive genetic correlation with the presence of PTSD, traumatic events,  
198 and deprivation index; negative genetic correlation with social support and household  
199 income.

200 Considering our genetic correlation findings, we conducted bidirectional PRS  
201 between CRP and trauma traits, PGC-PTSD Freeze 1.5 case-control status, and  
202 socioeconomic traits. After FDR 5% correction for the number of PRS thresholds, we  
203 found 12 significant associations (Table 1). The most significant PRS association was  
204 observed between household income and CRP ( $R^2=0.08\%$ ; FDR Q-value= $7.45\times 10^{-25}$ ).

205

#### 206 *Mendelian randomization (MR)*

207 Based on the PRS findings, we performed two-sample MR to assess the  
208 causality among the traits. If heterogeneity or pleiotropy was identified within the  
209 genetic instruments, we removed the outlier variants to verify that the causal estimates  
210 were not generated by potential biases within the genetic instruments.

211 In our MR analysis, we found evidence supporting several causal relationships  
212 among the traits investigated (Figure 2; Supplemental Table 3). Our results suggest a  
213 bidirectional association between PTSD and CRP, where genetically determined CRP  
214 levels have a causal effect on PTSD ( $\beta=0.065$ , 95% CI: 0.012 to 0.119,  $p=0.015$ ), and  
215 genetic liability to PTSD has a causal effect on CRP ( $\beta=0.008$ , 95% CI: 0.001 to 0.015,  
216  $p=0.024$ ). We observed the presence of possible heterogeneity in SNPs evaluated in the  
217 PTSD $\rightarrow$ CRP association (heterogeneity test  $p=0.001$ ). However, after removal of the  
218 outlier variants from the genetic instrument, the PTSD $\rightarrow$ CRP association remained  
219 significant ( $\beta=0.008$ , 95% CI: 0.002 to 0.015,  $p=0.009$ ).

220 Among the traits related to traumatic events and social support, we observed that  
221 CRP also has a negative causal effect on the “Felt loved as a child” trait from UKB ( $\beta=-$   
222 0.02, 95% CI: -0.034 to -0.007,  $p=0.003$ ). However, strong evidence of heterogeneity  
223 was present among the variants included in the genetic instrument (heterogeneity test  
224  $p=4.26\times 10^{-5}$ ). Removing the variants contributing to heterogeneity within the genetic  
225 instrument, we confirmed the CRP-“Felt loved as a child” association ( $\beta=-0.017$ , 95%  
226 CI: -0.031 to -0.004,  $p=0.008$ ). “Felt loved as a child” trait showed a protective effect  
227 on PTSD risk ( $\beta=-0.139$ , 95% CI: -0.206 to -0.071,  $p=5.64\times 10^{-6}$ ). However, the genetic  
228 instrument was affected by heterogeneity (heterogeneity test  $p=0.002$ ). Removing the  
229 variants generating the heterogeneity within the genetic instrument, we confirmed the  
230 protective effect of “Felt loved as a child” trait on PTSD ( $\beta=-0.19$ , 95%CI=-0.124 to -  
231 0.257,  $p=2.1\times 10^{-8}$ ).

232 We also observed that indicators of SES affect both CRP levels and PTSD risk.  
233 Household income showed a negative bidirectional association with CRP (household

234 income→CRP  $\beta=-0.131$ , 95%CI=-0.161 to -0.102,  $p=1.06\times 10^{-18}$ ; CRP→household  
235 income  $\beta=-0.016$ , 95%CI=-0.027 to -0.005,  $p=0.004$ ). Both household income and  
236 deprivation index have a causal effect on PTSD (Household income:  $\beta=-0.277$ , 95% CI:  
237 -0.312 to -0.142,  $p=1.57\times 10^{-7}$ ; Deprivation index:  $\beta=0.389$ , 95% CI: 0.262 to 0.515,  
238  $p=1.63\times 10^{-9}$ ). The effects were confirmed also after removing outlier variants when  
239 heterogeneity or horizontal pleiotropy was observed within the genetic instruments  
240 (Supplemental Table 3)

241 Finally, we performed a MVMR analysis to verify whether the causal effects  
242 observed among PTSD, CRP, social support, and SES are independent from each other  
243 (Figure 3). We confirmed that genetically determined CRP has causal effect on PTSD,  
244 independently of the “Felt loved as a child” association ( $\beta=0.066$ , 95% CI: 0.007 to  
245 0.126,  $p=0.029$ ; Figure 3A). However, the CRP→PTSD association (univariate MR  
246  $\beta=0.066$ , 95% CI=0.013 – 0.119,  $p=0.015$ ; multivariate MR  $\beta=0.043$ , 95% CI=-0.027 –  
247 0.113,  $p=0.232$ ) was not independent from the effect of deprivation index (Deprivation  
248 index→PTSD: univariate MR:  $\beta=0.38$ ,  $p=1.63\times 10^{-9}$ , 95% CI=0.263 – 0.516;  
249 multivariate MR  $\beta=0.27$ ,  $p=0.016$ ; 95% CI= 0.050 – 0.498; Figure 3B) and household  
250 income (Household income→PTSD: univariate MR  $\beta=-0.22$ , 95% CI=-0.312 – -0.142,  
251  $p=1.57\times 10^{-7}$ ; multivariate MR  $\beta=-0.17$ , 95% CI=-0.294 – 0.051,  $p=0.005$ ; Figure 3C).

252

## 253 Discussion

254 We used genome-wide data to investigate the genetic overlap and the causal  
255 mechanisms between CRP levels and PTSD, also considering the effects of SES,  
256 traumatic experiences, and social support. Our findings indicate that there is  
257 bidirectional association between PTSD and CRP levels, which appears to be strongly  
258 affected by SES.

259 CRP is a protein that responds to inflammatory stimuli by triggering cellular  
260 reactions and it is normally induced through pro-inflammatory cytokines, mainly by  
261 interleukin-6 secretion.<sup>38, 39</sup> CRP may be produced in the microvessel endothelial cells  
262 that form the blood-brain-barrier, and peripheral CRP can affect the central nervous  
263 system via mechanisms of blood-brain barrier disruption associated with elevated levels  
264 of peripheral inflammatory cytokines.<sup>40, 41</sup> Higher levels of pro-inflammatory cytokines  
265 may influence neurotransmission, leading to altered production of serotonin,  
266 norepinephrine, dopamine and brain-derived neurotrophic factor. This effect on levels  
267 of neurotransmitters may be associated with specific psychiatric symptoms, such as



268 anhedonia.<sup>42</sup> Furthermore, these cytokines may influence the neurocircuitry, causing  
269 alterations in motivation status, and anxiety, arousal, and alarm response.<sup>43</sup> Twin and  
270 family studies estimated that heritability of CRP is around 35%-40%.<sup>24</sup> Several  
271 environmental factors, such as sociodemographic variables, dietary habits, behavioral  
272 and lifestyle factors, are also strongly associated with CRP level.<sup>44</sup> Previous cross-  
273 sectional and longitudinal studies highlighted the presence of a bidirectional association  
274 between PTSD and CRP levels.<sup>6-13</sup> Our findings confirm this scenario. However, we  
275 also observed that the CRP-PTSD association is not independent from SES (i.e. high  
276 deprivation index and low household income). The effect of SES on CRP levels was  
277 previously observed in studies highlighting the association of increased CRP levels with  
278 low SES and traumatic childhood experiences.<sup>45</sup> In addition, low SES has been  
279 associated with DNA methylation of genes involved in inflammation, suggesting that  
280 alterations in epigenetics of specific genes might influence the inflammation response  
281 leading to increased inflammatory markers.<sup>46, 47</sup>

282 A recent GWAS of social stratification in Great Britain showed that genetic  
283 factors related to socio-economic status (educational, income, employment) are  
284 associated with a wide range of physical and mental health outcomes.<sup>48</sup> Lower  
285 economic status might be a mediator of the negative association between educational  
286 attainment and PTSD.<sup>49</sup> In line with these previous findings, we found that SES might  
287 affect the interplay among inflammatory processes (i.e., CRP level), PTSD, and  
288 childhood social support. This confirms that SES may affect several of the comorbid  
289 traits associated with PTSD.

290 Furthermore, we found that “Felt loved as a child” was a protective factor with  
291 respect to genetic liability to PTSD and CRP levels. Social support systems have been  
292 considered as an important protective factor for mental health and well-being of  
293 individuals, and refer to social interaction which involves love, care, respect, affection,  
294 acceptance, and financial assistance.<sup>50, 51</sup> Social support might influence trauma  
295 perception and cognitive processes and consequently reduce the risk to develop  
296 psychiatric disorders. Individuals with low social support had worse prognosis of  
297 PTSD.<sup>52, 53</sup> Additionally, high levels of social support were associated with reduced  
298 CRP levels.<sup>54, 55</sup>

299 Although we present novel results contributing to understand the association  
300 among PTSD, CRP levels, traumatic events, and social support, our study has several  
301 limitations. Our analyses focused on CRP levels only, because no large-scale GWAS

302 has investigated other inflammatory biomarkers. Further studies will be needed to verify  
303 whether the same effects are present across inflammation-related molecules such as IL-  
304 6. The analyses were conducted using GWAS in subjects of European ancestry, thus we  
305 cannot generalize these results to other populations. The magnitude of estimates for the  
306 effect of CRP on PTSD is relatively small, which may indicate a minor contribution of  
307 the associations reported in the biology of PTSD. The genetic information about PTSD  
308 and trauma traits were obtained across different cohorts, which may cause heterogeneity  
309 in the outcomes related to stress exposition. The datasets investigated were generated  
310 from participants assessed using different instruments, also including online  
311 questionnaires. Although this approach was needed to collect information from a large  
312 cohort and the online instruments were validated,<sup>26</sup> this may have affected the quality of  
313 the data collected.

314 In conclusion, this study is the first analysis leveraging large-scale genome-wide  
315 datasets to investigate the underlying mechanisms linking CRP, PTSD, and traumatic  
316 experiences. Our findings support a bidirectional association between PTSD and CRP,  
317 which appears to be strongly affected by SES. Additionally, SES traits seem to also  
318 mediate the interplay among CRP levels, PTSD, and childhood emotional support.

319

### 320 **Conflict of Interest**

321 Dr. Murray Stein is paid for his editorial work on the journals Biological  
322 Psychiatry and Depression and Anxiety, and the health professional reference Up-To-  
323 Date. Dr. Dan Stein received personal fees from Lundbeck and Sun Pharmaceutical  
324 Industries. The other authors declare no competing interests.

325

### 326 **Acknowledgements**

327 This research was supported by the Veterans Affairs National Center for  
328 Posttraumatic Stress Disorder Research, the Simons Foundation Autism Research  
329 Initiative (SFARI Explorer Award: 534858) and the American Foundation for Suicide  
330 Prevention (YIG-1-109-16), and R01MH106595. C.M.C. and S.I.B. were supported by  
331 Fundação de Amparo à Pesquisa do Estado de São Paulo (FAPESP 2018/05995-4)  
332 international fellowship and Coordenação de Aperfeiçoamento de Pessoal de Nível  
333 Superior (CAPES Code 001).

334

### 335 **References**

- 336 1. North CS, Suris AM, Smith RP, King RV. The evolution of PTSD criteria across  
337 editions of DSM. *Ann Clin Psychiatry* 2016; **28**(3): 197-208.
- 338 2. Michopoulos V, Rothbaum AO, Jovanovic T, Almlie LM, Bradley B, Rothbaum  
339 BO *et al.* Association of CRP genetic variation and CRP level with elevated  
340 PTSD symptoms and physiological responses in a civilian population with high  
341 levels of trauma. *Am J Psychiatry* 2015; **172**(4): 353-362.
- 342 3. Vashist SK, Venkatesh AG, Marion Schneider E, Beaudoin C, Luppia PB, Luong  
343 JH. Bioanalytical advances in assays for C-reactive protein. *Biotechnol Adv*  
344 2016; **34**(3): 272-290.
- 345 4. Rosen RL, Levy-Carrick N, Reibman J, Xu N, Shao Y, Liu M *et al.* Elevated C-  
346 reactive protein and posttraumatic stress pathology among survivors of the 9/11  
347 World Trade Center attacks. *J Psychiatr Res* 2017; **89**: 14-21.
- 348 5. Heath NM, Chesney SA, Gerhart JI, Goldsmith RE, Luborsky JL, Stevens NR *et*  
349 *al.* Interpersonal violence, PTSD, and inflammation: potential psychogenic  
350 pathways to higher C-reactive protein levels. *Cytokine* 2013; **63**(2): 172-178.
- 351 6. Tursich M, Neufeld RW, Frewen PA, Harricharan S, Kibler JL, Rhind SG *et al.*  
352 Association of trauma exposure with proinflammatory activity: a transdiagnostic  
353 meta-analysis. *Transl Psychiatry* 2014; **4**: e413.
- 354 7. Passos IC, Vasconcelos-Moreno MP, Costa LG, Kunz M, Brietzke E, Quevedo J  
355 *et al.* Inflammatory markers in post-traumatic stress disorder: a systematic  
356 review, meta-analysis, and meta-regression. *Lancet Psychiatry* 2015; **2**(11):  
357 1002-1012.
- 358 8. Eraly SA, Nievergelt CM, Maihofer AX, Barkauskas DA, Biswas N, Agorastos  
359 A *et al.* Assessment of plasma C-reactive protein as a biomarker of  
360 posttraumatic stress disorder risk. *JAMA Psychiatry* 2014; **71**(4): 423-431.
- 361 9. Cohen M, Meir T, Klein E, Volpin G, Assaf M, Pollack S. Cytokine levels as  
362 potential biomarkers for predicting the development of posttraumatic stress  
363 symptoms in casualties of accidents. *Int J Psychiatry Med* 2011; **42**(2): 117-131.
- 364 10. Glaus J, von Kanel R, Lasserre AM, Strippoli MF, Vandeleur CL, Castelao E *et*  
365 *al.* The bidirectional relationship between anxiety disorders and circulating  
366 levels of inflammatory markers: Results from a large longitudinal population-  
367 based study. *Depress Anxiety* 2018; **35**(4): 360-371.
- 368 11. Michopoulos V, Beurel E, Gould F, Dhabhar FS, Schultebrucks K, Galatzer-  
369 Levy I *et al.* Association of Prospective Risk for Chronic PTSD Symptoms With  
370 Low TNFalpha and IFNgamma Concentrations in the Immediate Aftermath of  
371 Trauma Exposure. *Am J Psychiatry* 2019; appiajp201919010039.
- 372 12. Sumner JA, Chen Q, Roberts AL, Winning A, Rimm EB, Gilsanz P *et al.*  
373 Posttraumatic stress disorder onset and inflammatory and endothelial function  
374 biomarkers in women. *Brain Behav Immun* 2018; **69**: 203-209.
- 375 13. Sumner JA, Chen Q, Roberts AL, Winning A, Rimm EB, Gilsanz P *et al.* Cross-  
376 Sectional and Longitudinal Associations of Chronic Posttraumatic Stress  
377 Disorder With Inflammatory and Endothelial Function Markers in Women. *Biol*  
378 *Psychiatry* 2017; **82**(12): 875-884.
- 379 14. Bielas H, Meister-Langraf RE, Schmid JP, Barth J, Znoj H, Schnyder U *et al.* C-  
380 reactive protein as a predictor of posttraumatic stress induced by acute  
381 myocardial infarction. *Gen Hosp Psychiatry* 2018; **53**: 125-130.
- 382 15. Farr OM, Ko BJ, Joung KE, Zaichenko L, Usher N, Tsoukas M *et al.*  
383 Posttraumatic stress disorder, alone or additively with early life adversity, is  
384 associated with obesity and cardiometabolic risk. *Nutr Metab Cardiovasc Dis*  
385 2015; **25**(5): 479-488.

- 386 16. O'Donovan A, Cohen BE, Seal KH, Bertenthal D, Margaretten M, Nishimi K *et al.* Elevated risk for autoimmune disorders in Iraq and Afghanistan veterans with  
387 posttraumatic stress disorder. *Biol Psychiatry* 2015; **77**(4): 365-374.  
388
- 389 17. Evans DM, Davey Smith G. Mendelian Randomization: New Applications in  
390 the Coming Age of Hypothesis-Free Causality. *Annu Rev Genomics Hum Genet*  
391 2015; **16**: 327-350.
- 392 18. Ravera S, Carrasco N, Gelernter J, Polimanti R. Phenomic Impact of  
393 Genetically-Determined Euthyroid Function and Molecular Differences between  
394 Thyroid Disorders. *J Clin Med* 2018; **7**(10).
- 395 19. Polimanti R, Peterson RE, Ong JS, MacGregor S, Edwards AC, Clarke TK *et al.*  
396 Evidence of causal effect of major depression on alcohol dependence: findings  
397 from the psychiatric genomics consortium. *Psychol Med* 2019; **49**(7): 1218-  
398 1226.
- 399 20. Prag P, Mills MC, Wittek R. Subjective socioeconomic status and health in  
400 cross-national comparison. *Soc Sci Med* 2016; **149**: 84-92.
- 401 21. Stepanikova I, Bateman LB, Oates GR. Systemic Inflammation in Midlife:  
402 Race, Socioeconomic Status, and Perceived Discrimination. *Am J Prev Med*  
403 2017; **52**(1S1): S63-S76.
- 404 22. Williams DR, Priest N, Anderson NB. Understanding associations among race,  
405 socioeconomic status, and health: Patterns and prospects. *Health Psychol* 2016;  
406 **35**(4): 407-411.
- 407 23. Nievergelt CM, Maihofer AX, Klengel T, Atkinson E, Chen CY, Choi K *et al.*  
408 International meta-analysis of PTSD genome-wide association studies identifies  
409 sex- and ancestry-specific genetic risk loci. *Nat Comms* 2019; **In Press**.
- 410 24. Ligthart S, Vaez A, Vosa U, Stathopoulou MG, de Vries PS, Prins BP *et al.*  
411 Genome Analyses of >200,000 Individuals Identify 58 Loci for Chronic  
412 Inflammation and Highlight Pathways that Link Inflammation and Complex  
413 Disorders. *Am J Hum Genet* 2018; **103**(5): 691-706.
- 414 25. Bycroft C, Freeman C, Petkova D, Band G, Elliott LT, Sharp K *et al.* The UK  
415 Biobank resource with deep phenotyping and genomic data. *Nature* 2018;  
416 **562**(7726): 203-209.
- 417 26. Davis KAS, Coleman JRI, Adams M, Allen N, Breen G, Cullen B *et al.* Mental  
418 health in UK Biobank: development, implementation and results from an online  
419 questionnaire completed by 157 366 participants. *BJPsych Open* 2018; **4**(3): 83-  
420 90.
- 421 27. Morris R, Carstairs V. Which deprivation? A comparison of selected deprivation  
422 indexes. *J Public Health Med* 1991; **13**(4): 318-326.
- 423 28. Bulik-Sullivan B, Finucane HK, Anttila V, Gusev A, Day FR, Loh PR *et al.* An  
424 atlas of genetic correlations across human diseases and traits. *Nat Genet* 2015;  
425 **47**(11): 1236-1241.
- 426 29. Euesden J, Lewis CM, O'Reilly PF. PRSice: Polygenic Risk Score software.  
427 *Bioinformatics* 2015; **31**(9): 1466-1468.
- 428 30. Hemani G, Zheng J, Elsworth B, Wade KH, Haberland V, Baird D *et al.* The  
429 MR-Base platform supports systematic causal inference across the human  
430 phenome. *Elife* 2018; **7**.
- 431 31. Bowden J, Del Greco MF, Minelli C, Davey Smith G, Sheehan N, Thompson J.  
432 A framework for the investigation of pleiotropy in two-sample summary data  
433 Mendelian randomization. *Stat Med* 2017; **36**(11): 1783-1802.

- 434 32. Davey Smith G, Davies NM, Dimou N, Egger M, Gallo V, Golub R *et al.*  
435 STROBE-MR: Guidelines for strengthening the reporting of Mendelian  
436 randomization studies. *PeerJ Preprints* 2019; **7**: e27857v27851.
- 437 33. Bowden J, Davey Smith G, Burgess S. Mendelian randomization with invalid  
438 instruments: effect estimation and bias detection through Egger regression. *Int J*  
439 *Epidemiol* 2015; **44**(2): 512-525.
- 440 34. Verbanck M, Chen CY, Neale B, Do R. Detection of widespread horizontal  
441 pleiotropy in causal relationships inferred from Mendelian randomization  
442 between complex traits and diseases. *Nat Genet* 2018; **50**(5): 693-698.
- 443 35. Burgess S, Bowden J, Fall T, Ingelsson E, Thompson SG. Sensitivity Analyses  
444 for Robust Causal Inference from Mendelian Randomization Analyses with  
445 Multiple Genetic Variants. *Epidemiology* 2017; **28**(1): 30-42.
- 446 36. Zhao Q, Wang J, Hemani G, Bowden J, Small DS. Statistical inference in two-  
447 sample summary-data Mendelian randomization using robust adjusted profile  
448 score. *arXiv* 2019: 1801.09652.
- 449 37. Burgess S, Thompson SG. Multivariable Mendelian randomization: the use of  
450 pleiotropic genetic variants to estimate causal effects. *Am J Epidemiol* 2015;  
451 **181**(4): 251-260.
- 452 38. Dantzer R, O'Connor JC, Freund GG, Johnson RW, Kelley KW. From  
453 inflammation to sickness and depression: when the immune system subjugates  
454 the brain. *Nat Rev Neurosci* 2008; **9**(1): 46-56.
- 455 39. Fernandes BS, Steiner J, Molendijk ML, Dodd S, Nardin P, Goncalves CA *et al.*  
456 C-reactive protein concentrations across the mood spectrum in bipolar disorder:  
457 a systematic review and meta-analysis. *Lancet Psychiatry* 2016; **3**(12): 1147-  
458 1156.
- 459 40. Hsueh H, Kastin AJ, Mishra PK, Pan W. C-reactive protein increases BBB  
460 permeability: implications for obesity and neuroinflammation. *Cell Physiol*  
461 *Biochem* 2012; **30**(5): 1109-1119.
- 462 41. Sproston NR, Ashworth JJ. Role of C-Reactive Protein at Sites of Inflammation  
463 and Infection. *Front Immunol* 2018; **9**: 754.
- 464 42. Miller AH, Haroon E, Raison CL, Felger JC. Cytokine targets in the brain:  
465 impact on neurotransmitters and neurocircuits. *Depress Anxiety* 2013; **30**(4):  
466 297-306.
- 467 43. Felger JC, Haroon E, Miller AH. What's CRP got to do with it? Tackling the  
468 complexities of the relationship between CRP and depression. *Brain Behav*  
469 *Immun* 2018; **73**: 163-164.
- 470 44. Shen J, Ordovas JM. Impact of genetic and environmental factors on hsCRP  
471 concentrations and response to therapeutic agents. *Clin Chem* 2009; **55**(2): 256-  
472 264.
- 473 45. O'Donovan A, Neylan TC, Metzler T, Cohen BE. Lifetime exposure to traumatic  
474 psychological stress is associated with elevated inflammation in the Heart and  
475 Soul Study. *Brain Behav Immun* 2012; **26**(4): 642-649.
- 476 46. Stringhini S, Polidoro S, Sacerdote C, Kelly RS, van Veldhoven K, Agnoli C *et*  
477 *al.* Life-course socioeconomic status and DNA methylation of genes regulating  
478 inflammation. *Int J Epidemiol* 2015; **44**(4): 1320-1330.
- 479 47. Lin YH, Jen MH, Chien KL. Association between life-course socioeconomic  
480 position and inflammatory biomarkers in older age: a nationally representative  
481 cohort study in Taiwan. *BMC Geriatr* 2017; **17**(1): 201.

- 482 48. Abdellaoui A, Hugh-Jones D, Kemper KE, Holtz Y, Nivard MG, Veul L *et al.*  
483 Genetic Consequences of Social Stratification in Great Britain. *bioRxiv* 2018:  
484 457515.
- 485 49. Polimanti R, Ratanatharathorn A, Maihofer AX, Choi KW, Stein MB, Morey  
486 RA *et al.* Association of Economic Status and Educational Attainment With  
487 Posttraumatic Stress Disorder: A Mendelian Randomization Study. *JAMA Netw*  
488 *Open* 2019; **2**(5): e193447.
- 489 50. Lakey B, Orehek E. Relational regulation theory: a new approach to explain the  
490 link between perceived social support and mental health. *Psychol Rev* 2011;  
491 **118**(3): 482-495.
- 492 51. Hakulinen C, Pulkki-Raback L, Jokela M, J EF, Aalto AM, Virtanen M *et al.*  
493 Structural and functional aspects of social support as predictors of mental and  
494 physical health trajectories: Whitehall II cohort study. *J Epidemiol Community*  
495 *Health* 2016; **70**(7): 710-715.
- 496 52. Lee JS. Perceived social support functions as a resilience in buffering the impact  
497 of trauma exposure on PTSD symptoms via intrusive rumination and entrapment  
498 in firefighters. *PLoS One* 2019; **14**(8): e0220454.
- 499 53. De Nutte L, Okello J, Derluyn I. Social relationships and social support among  
500 post-war youth in Northern Uganda. *Int J Psychol* 2017; **52**(4): 291-299.
- 501 54. Shimanoe C, Hara M, Nishida Y, Nanri H, Otsuka Y, Horita M *et al.* Coping  
502 strategy and social support modify the association between perceived stress and  
503 C-reactive protein: a longitudinal study of healthy men and women. *Stress* 2018;  
504 **21**(3): 237-246.
- 505 55. Elliot AJ, Heffner KL, Mooney CJ, Moynihan JA, Chapman BP. Social  
506 Relationships and Inflammatory Markers in the MIDUS Cohort: The Role of  
507 Age and Gender Differences. *J Aging Health* 2018; **30**(6): 904-923.  
508  
509  
510

511

512 **Table 1:** Significant PRS results for CRP, PTSD, trauma and socioeconomic traits.

| Base                  | Target                                 | R <sup>2</sup> | FDR Q-value |
|-----------------------|----------------------------------------|----------------|-------------|
| Household income      | CRP                                    | 0.08%          | 7.45E-25    |
| Household income      | PTSD                                   | 0.01%          | 1.36E-07    |
| Deprivation index     | PTSD                                   | 0.01%          | 6.00E-05    |
| CRP                   | Physically abused by family as a child | 0.01%          | 1.80E-04    |
| Deprivation index     | CRP                                    | 0.01%          | 2.70E-04    |
| PTSD                  | Household income                       | 0.002%         | 5.52E-04    |
| CRP                   | Able to pay rent/mortgage as an adult  | 0.010%         | 8.10E-04    |
| CRP                   | Felt loved as a child                  | 0.012%         | 4.20E-03    |
| Felt loved as a child | CRP                                    | 0.01%          | 1.60E-02    |
| PTSD                  | CRP                                    | 0.01%          | 2.70E-02    |
| CRP                   | PTSD                                   | 0.01%          | 3.70E-02    |
| CRP                   | Household income                       | <0.001%        | 3.70E-02    |

513

514

515

516

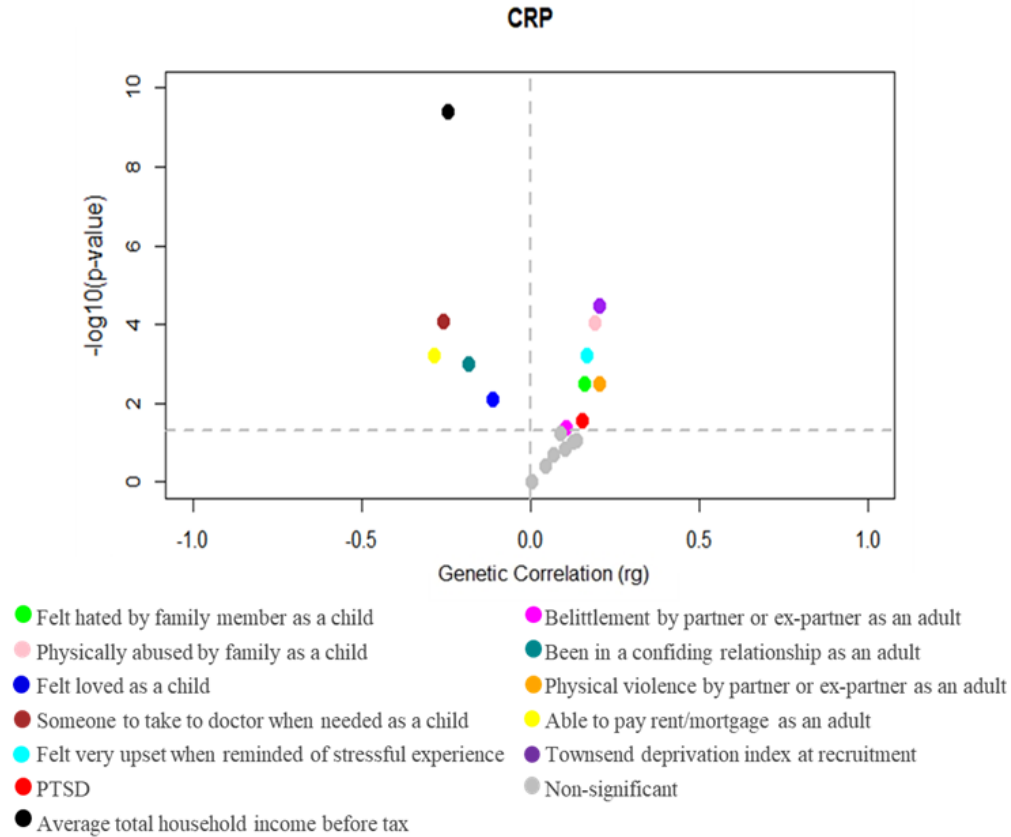

517

518

**Figure 1:** Genetic correlation of CRP with PTSD, behavioral and emotional response to trauma, exposure to traumatic events, and the presence of social support.

519

520

521



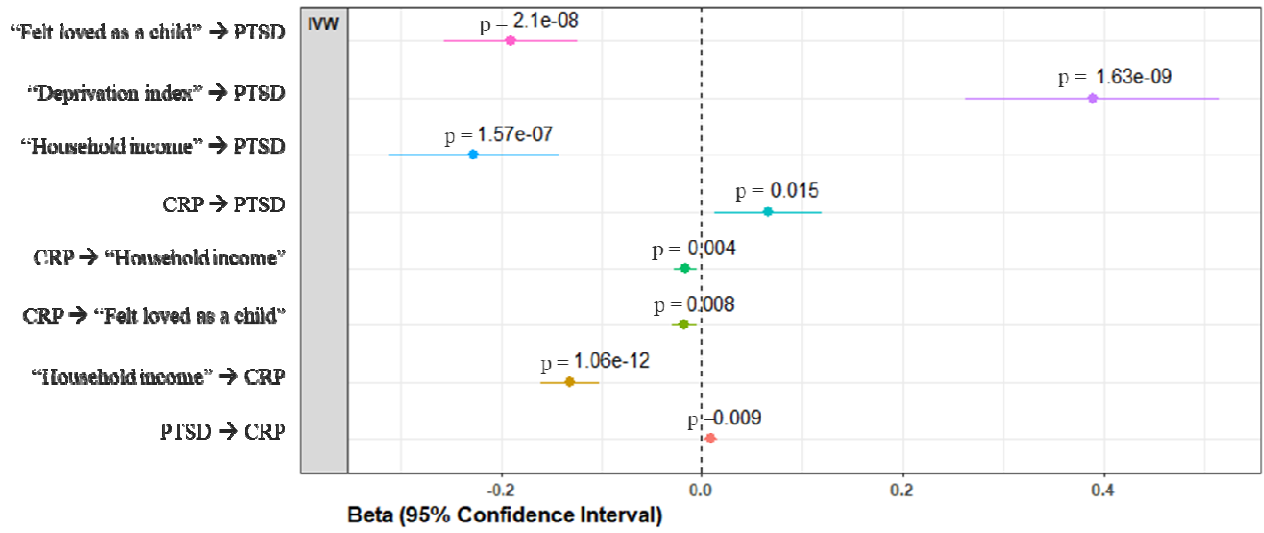

522

523

524

**Figure 2:** Significant two-sample MR results.

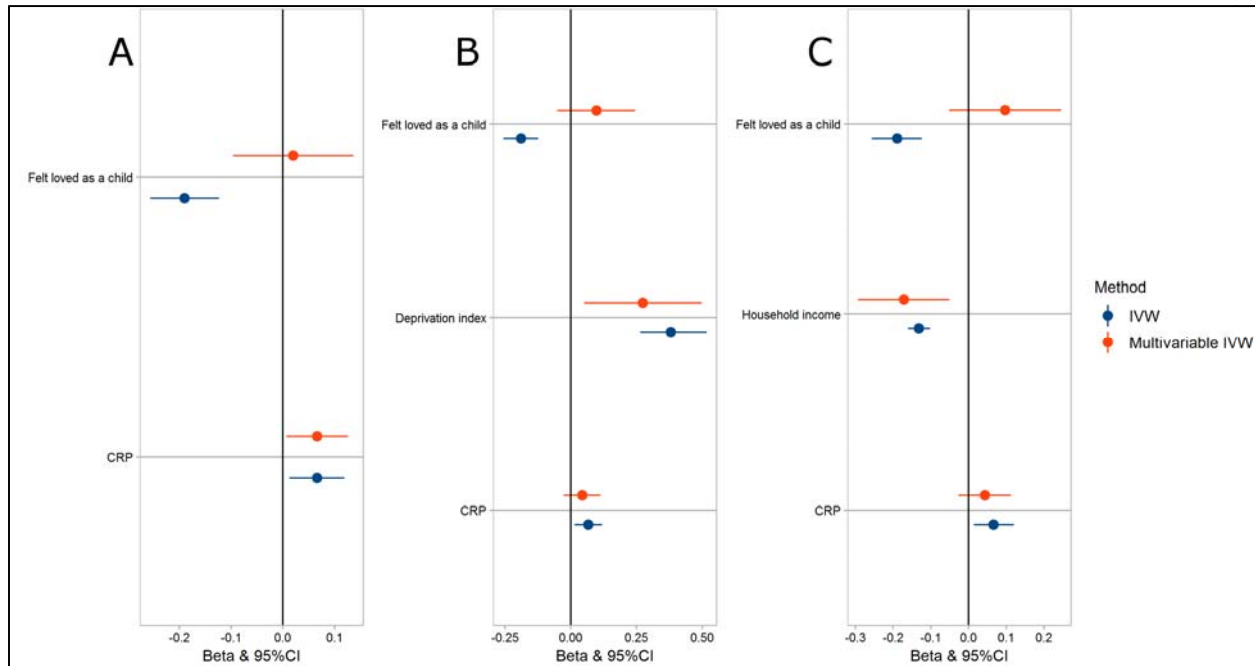

525

526 **Figure 3:** Multivariable MR results considering the following models: **A.** Felt loved as  
527 a child + CRP → PTSD; **B.** Felt loved as a child + Deprivation index + CRP → PTSD;  
528 **C.** Felt loved as a child + Household income + CRP → PTSD.

529

530

531

532

533

534

535

536

537

538

539

540

541

542
